# Supplementary material for: A multifunctional substance P-conjugated chitosan hydrochloride hydrogel accelerates full-thickness wound healing by enhancing synchronized vascularization, extracellular matrix deposition, and nerve regeneration
Source: Royal Society of Chemistry journal article supplement (doi:10.1039/d1bm00357g), 2021-01-01
Supplement: d1bm00357g1.pdf [file d1bm00357g1.pdf]

## Supplementary Information

# **A multifunctional substance P-conjugated chitosan hydrochloride hydrogel accelerates full-thickness wound healing by enhancing synchronized vascularization, extracellular matrix deposition, and nerve regeneration**

Hao Li <sup>a</sup>, Mengna Li <sup>b</sup>, Pei Liu <sup>a</sup>, Kaiyang Wang <sup>a</sup>, Haoyu Fang <sup>a</sup>, Junhui Yin <sup>c</sup>, Daoyu Zhu <sup>a</sup>, Qianhao Yang <sup>a</sup>, Junjie Gao <sup>a,c</sup>, Qinfei Ke <sup>b</sup>, Hongping Yu <sup>\*a,d</sup>, Yaping Guo <sup>\*b</sup>, Youshui Gao <sup>\*a</sup>, Changqing Zhang <sup>a</sup>

---

<sup>a</sup> Department of Orthopaedic Surgery, Shanghai Jiao Tong University Affiliated Sixth People's Hospital, Shanghai 200233, China

<sup>b</sup> The Education Ministry Key Lab of Resource Chemistry and Shanghai Key Laboratory of Rare Earth Functional Materials, Shanghai Normal University, Shanghai 200234, China

<sup>c</sup> Institute of Microsurgery on Extremities, Shanghai Jiao Tong University Affiliated Sixth People's Hospital, Shanghai 200233, China

<sup>d</sup> The First Affiliated Hospital of Xiamen University, Xiamen 361005, China

Hao Li and Mengna Li contributed equally to this work.

\* Corresponding authors.

E-mail addresses: yuhp09@126.com (H. Yu), ypguo@shnu.edu.cn (Y. Guo), gaoyoushui@sjtu.edu.cn (Y. Gao)

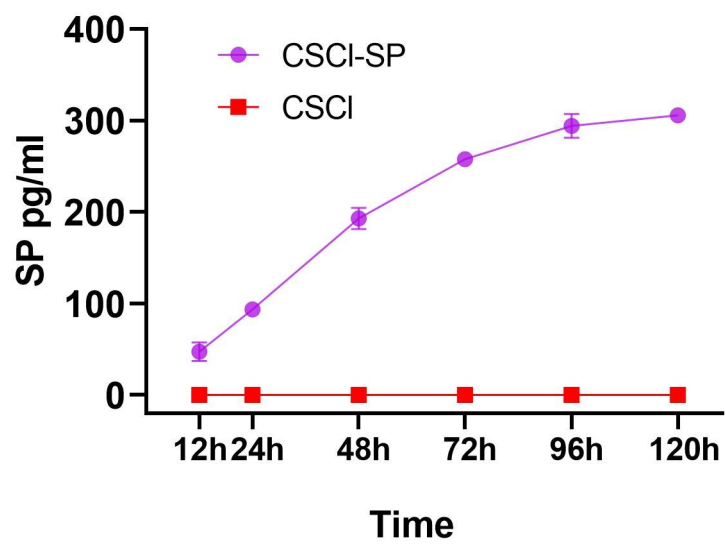

Fig. S1 Release rates and release profiles of CSCI and CSCI-SP.

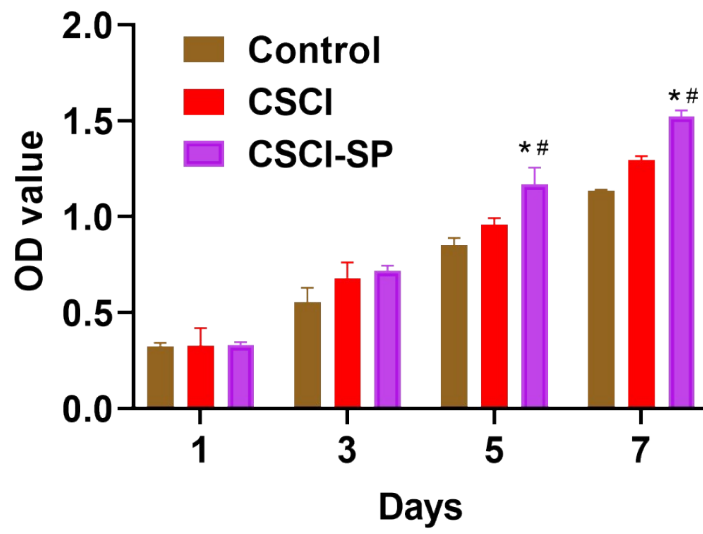

**Fig. S2** Effects of dissolution products on the proliferation of HUVECs. CSCI-SP hydrogel significantly promoted the proliferation of HUVECs on day 5 and 7. # indicates significant differences between the CSCI hydrogel and CSCI-SP hydrogel. \* $P < 0.05$ , # $P < 0.05$

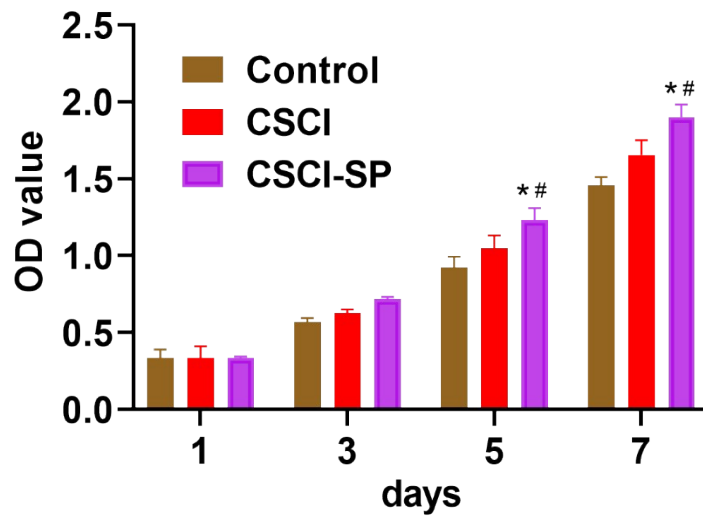

**Fig. S3** Effects of dissolution products on the proliferation of fibroblasts. CSCI-SP hydrogel significantly promoted the proliferation of fibroblasts on day 5 and 7. # indicates significant differences between the CSCI hydrogel and CSCI-SP hydrogel. \* $P < 0.05$ , # $P < 0.05$ .

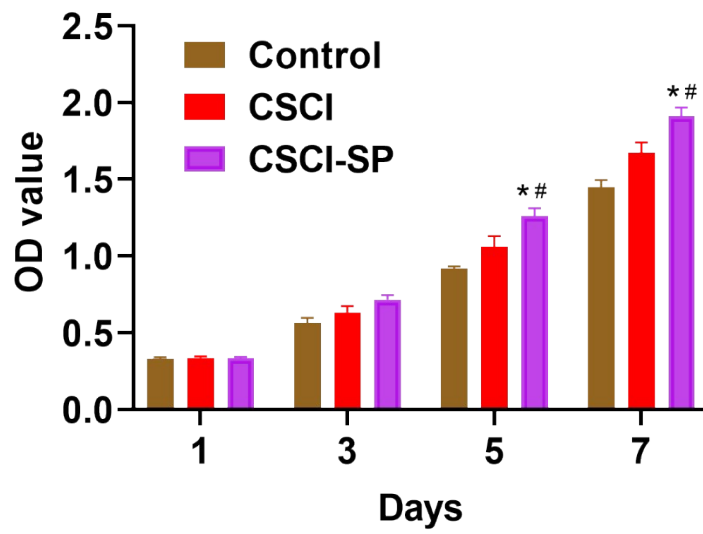

**Fig. S4** Effects of dissolution products on the proliferation of Neuro 2A cells. CSCI-SP hydrogel significantly promoted the proliferation of Neuro 2A cells on day 5 and 7. # indicates significant differences between the CSCI hydrogel and CSCI-SP hydrogel. \* $P < 0.05$ , # $P < 0.05$ .
